# Supplementary material for: Curricular Clocks and Cognitive Costs: A Multi-Institutional Study of Perceived Academic and Emotional Benefits of Flexibility in Undergraduate Medical Curricula
Source: Research Square preprint supplement (doi:10.21203/rs.3.rs-7654000/v1), 2025-11-11
Supplement: Supplementary file 1 [file 792f52678f05d48f3627625b.docx]

**Supplementary File 1**

**Perceived Academic and Emotional Benefits of Flexibility in Undergraduate Medical Curricula**

**Questionnaire**

**Section 1: Demographic Information**

1. **Age***: ____________
2. **Gender***:

- ☐ Male
- ☐ Female

1. **Institution Type***:

- ☐ Public
- ☐ Private

1. **Academic Year***:

- ☐ 1
- ☐ 2
- ☐ 3
- ☐ 4
- ☐ 5

**Section 2: Perceptions of Current Curriculum and Flexibility**

This section assesses students’ perceptions regarding “rigidity” in the current medical curriculum in Pakistan and their views on future “flexible learning” options.

*Curriculum rigidity means that students are expected to learn the same material at the same pace in a fixed learning environment with no flexible or individualized learning options.*

**Response scale:**
1 – Strongly Disagree 2 – Disagree 3 – Neutral 4 – Agree 5 – Strongly Agree

1. The timetable is too rigid for my learning preferences.
2. I feel restricted by the fixed structure of the curriculum.
3. The curriculum lacks options for personalized pacing.
4. Scheduled academic activities leave little room for individual adjustments.
5. I have limited autonomy in planning my classes’ schedule.
6. I would like the option to choose between live and recorded lectures.
7. I prefer having self-paced modules in the curriculum.
8. Modular courses with flexible start and end dates would be helpful.
9. I support optional attendance or asynchronous learning opportunities.
10. I am in favor of individualized learning pathways.

**Section 3: Well-Being**

This section aims to assess the emotional well-being of students and how curricular rigidity affects it.

**Response scale:**
1 – Strongly Disagree 2 – Disagree 3 – Neutral 4 – Agree 5 – Strongly Agree

1. I struggle to maintain emotional well-being during academic terms.
2. I feel mentally exhausted by the current pace of the curriculum.
3. I find it difficult to recover from academic stress.
4. I often feel emotionally drained due to my academic workload.
5. I have experienced burnout symptoms during the semester.
6. Curriculum flexibility would help me maintain a better study-life balance.
7. My emotional well-being would improve if I had more control over my academic schedule.

**Section 4: Academic Performance**

This section explores how time rigidity and flexible options influence perceived academic performance.

**Response scale:**
1 – Strongly Disagree 2 – Disagree 3 – Neutral 4 – Agree 5 – Strongly Agree

1. I perform better when I have flexibility in managing academic tasks.
2. I cannot demonstrate my full academic potential under the current time-rigid schedule.
3. The current structure does not allow me to prepare well for assessments.
4. I find it difficult to manage my study time effectively within the present curriculum.
5. I would be more motivated to learn in a flexible learning environment.
6. A flexible curriculum would increase my long-term retention and understanding of course content.
7. I believe flexibility in how and when I study would lead to better academic performance.
8. Flexibility in assessments would allow me to demonstrate my knowledge more accurately.
